# Supplementary material for: Psychiatric advance directives for people living with schizophrenia, bipolar I disorders, or schizoaffective disorders: Study protocol for a randomized controlled trial – DAiP study
Source: Springer Nature journal article supplement (doi:10.1186/s12888-019-2416-9), 2019-12-01
Supplement: MOESM1 [file 17661174]

## Directives anticipées incitatives en Psychiatrie

### Personne concernée et personne(s) de confiance

Je soussigné(e), .....  
né(e) le ...../...../..... à .....  
désigne comme personnes de confiance, en application de l'article L. 311-5-1 du code de l'action sociale et des familles :

|                           | Nom | Contact<br>(n° de mobile) | Nature du lien | Rôle |
|---------------------------|-----|---------------------------|----------------|------|
| Personne de confiance n°1 |     |                           |                |      |
| Personne de confiance n°2 |     |                           |                |      |
| Personne à prévenir n°1   |     |                           |                |      |
| Personne à prévenir n°2   |     |                           |                |      |

Ajouter le cas échéant d'autres personnes de confiance/à prévenir sur papier libre, signé, joint au présent document.  
Afin de faire valoir les directives anticipées ci-rédigées, avec mon consentement lors de sa rédaction. Etant entendu que les directives anticipées incitatives en psychiatrie n'ont pas de valeur contraignante pour les proches et les soignants.

Fait le...../...../..... à..... seul(e) ou avec/en présence de (Nom, prénom des témoins).....

### Nom(s) et signatures des personnes de confiance :

- .....
- .....
- .....
- .....

**IMPORTANT** : Je suis capable de décider sauf quand (présentez les situations, « états », signes indiquant que vous devez laisser quelqu'un décider pour vous/que vous préférez « passer le relais à une personne de confiance) :

.....  
.....  
.....  
.....  
.....  
.....  
.....  
.....  
.....  
.....  
.....  
.....

*Signes avant-coureurs amenant à la crise (à remplir)*

1 –

3 –

2 –

4 –

Nouveaux signes (« mise à jour ») :

---

---

---

*Ce qui m'aide (à mettre en lien avec les signes avant-coureurs) :*

1 –

3 –

2 –

4 –

*Ce qui ne m'aide pas (à mettre en lien avec les signes avant-coureurs) :*

1 –

3 –

2 –

4 –

*Signaux de fin de crise, quand ça va mieux*

1 –

3 –

2 –

4 –

*En cas de mise en danger (auto ou hétéro agressivité)*

**A faire :**

**A ne pas faire :**

-  
-  
-

-  
-  
-

*En cas de crise :*

**Ce qui m'aide :**

**Ce qui ne m'aide pas :**

---

---

## Traitements ou soins qui m'aident/ne m'aident pas

### *Les traitements qui m'aident, qui peuvent être utilisés*

(Relatif à article 1111.4 du Code de la Santé Publique sur le choix du traitement)

| Traitement/Soin | Posologie | Usage/effet | Remarque |
|-----------------|-----------|-------------|----------|
|                 |           |             |          |
|                 |           |             |          |
|                 |           |             |          |
|                 |           |             |          |
|                 |           |             |          |

### *Les traitements qui ne m'aident pas, qui ne doivent pas être utilisés*

| Traitement/soin | Posologie | Usage/effet | Remarque |
|-----------------|-----------|-------------|----------|
|                 |           |             |          |
|                 |           |             |          |
|                 |           |             |          |
|                 |           |             |          |
|                 |           |             |          |

Je souhaite être conduit dans un lieu de soin : OUI  NON

*Lieux de soin (hôpitaux, cliniques, services, etc.) où je veux être pris(e) en soin :*

- -  
- -  
- -

Remarques : .....  
.....  
.....  
.....

*Lieux où je refuse d'être pris(e) en soin :*

- -  
- -  
- -

Remarques : .....

.....

.....

.....

***Si je refuse tout lieu de soin :***

Détailler la solution envisagée : où je préfère aller ; Avec qui ? Ce qu'il faut faire, etc.

.....

.....

.....

.....

.....

.....

.....

.....

.....

.....

**Par qui je souhaite/par qui je refuse d'être accompagné**

***Personnel médical***

(relatif à l'article 6,R.4127-6 du code de la santé publique sur le choix du médecin)

Par qui je veux être accompagné(e) :

Par qui je refuse d'être accompagné(e) :

- 
- 
- 

- 
- 
- 

***Personnel paramédical (infirmiers etc.), médiateurs, travailleurs sociaux, etc. :***

Par qui je veux être accompagné(e) :

Par qui je refuse d'être accompagné(e) :

- 
- 
- 

- 
- 
- 

***Autres remarques personnelles, choses à savoir, notes...***

.....

.....

.....

.....

.....

.....

.....

.....

.....

.....
